# Supplementary material
Source: HighWire-hosted journal article supplement (https://bjo.bmj.com/content/106/6/795)
Supplement: inline-supplementary-material-1 [file inline-supplementary-material-1.pdf]

## Online Supplementary Material 1: Preoperative Measurements (Biometry) and Postoperative Refraction (6 m)

|    | Gen | Year of birth | CCT | AD   | ACD  | LT   | AL    | R1   | R2   | K1 1.3375 | K2 1.3375 | AXIS | WTW   | IOL Typ | IOL Power | postoperative refraction (SEQ) |
|----|-----|---------------|-----|------|------|------|-------|------|------|-----------|-----------|------|-------|---------|-----------|--------------------------------|
| 1  | f   | 1937          | 535 | 2.42 | 2.96 | 4.38 | 21.34 | 7.17 | 7.01 | 47.07     | 48.15     | 155  | 12.13 | SA60AT  | 24.00     | -0.75                          |
| 2  | f   | 1947          | 559 | 2.15 | 2.71 | 4.67 | 21.31 | 7.24 | 7.08 | 46.62     | 47.67     | 151  | 11.28 | SA60AT  | 24.50     | -0.375                         |
| 3  | f   | 1927          | 532 | 1.57 | 2.10 | 5.42 | 21.37 | 7.33 | 6.77 | 46.04     | 49.85     | 9    | 11.09 | SA60AT  | 24.50     | -1.25                          |
| 4  | m   | 1951          | 554 | 2.69 | 3.24 | 4.23 | 20.80 | 7.07 | 6.82 | 47.74     | 49.49     | 175  | 11.67 | SA60AT  | 24.50     | 0.75                           |
| 5  | f   | 1944          | 531 | 2.21 | 2.74 | 4.89 | 21.28 | 7.20 | 7.15 | 46.88     | 47.20     | 59   | 12.11 | SA60AT  | 25.00     | 0.375                          |
| 6  | f   | 1927          | 506 | 2.18 | 2.69 | 4.50 | 20.93 | 7.11 | 7.03 | 47.47     | 48.01     | 161  | 11.47 | SA60AT  | 25.50     | -0.75                          |
| 7  | m   | 1941          | 517 | 1.73 | 2.25 | 5.43 | 21.17 | 7.48 | 7.32 | 45.12     | 46.11     | 101  | 11.15 | SA60AT  | 27.00     | 0                              |
| 8  | m   | 1952          | 604 | 2.00 | 2.60 | 4.89 | 20.93 | 7.24 | 7.10 | 46.62     | 47.54     | 28   | 11.57 | SA60AT  | 27.00     | -0.375                         |
| 9  | f   | 1937          | 527 | 1.91 | 2.44 | 4.58 | 21.25 | 7.46 | 7.41 | 45.24     | 45.53     | 91   | 11.50 | SA60AT  | 27.00     | 0                              |
| 10 | f   | 1932          | 554 | 1.91 | 2.46 | 5.55 | 21.29 | 7.50 | 7.37 | 45.00     | 45.81     | 159  | 11.54 | SA60AT  | 27.00     | -0.125                         |
| 11 | f   | 1947          | 585 | 1.94 | 2.53 | 4.86 | 21.31 | 7.58 | 7.25 | 44.55     | 46.54     | 102  | 11.11 | SA60AT  | 27.00     | -0.5                           |
| 12 | f   | 1946          | 487 | 2.01 | 2.49 | 4.35 | 21.32 | 7.39 | 7.39 | 45.64     | 45.64     | 0    | 10.95 | SA60AT  | 27.00     | -0.875                         |
| 13 | f   | 1931          | 521 | 2.11 | 2.63 | 4.92 | 21.55 | 7.59 | 7.47 | 44.47     | 45.18     | 92   | 12.01 | SA60AT  | 27.00     | -0.5                           |
| 14 | f   | 1934          | 585 | 2.04 | 2.63 | 5.20 | 20.94 | 7.29 | 7.10 | 46.30     | 47.54     | 6    | 11.65 | SA60AT  | 27.00     | -0.125                         |
| 15 | m   | 1957          | 531 | 2.94 | 3.47 | 3.55 | 21.14 | 7.50 | 7.22 | 45.00     | 46.75     | 165  | 11.51 | SA60AT  | 27.00     | 0                              |
| 16 | f   | 1924          | 574 | 2.05 | 2.62 | 5.37 | 21.88 | 7.80 | 7.68 | 43.27     | 43.95     | 101  | 12.12 | SA60AT  | 27.50     | 0.125                          |
| 17 | f   | 1935          | 538 | 2.13 | 2.67 | 4.70 | 21.59 | 7.88 | 7.60 | 42.83     | 44.41     | 24   | 11.94 | SA60AT  | 27.50     | 0.375                          |
| 18 | f   | 1937          | 581 | 1.97 | 2.55 | 4.73 | 21.34 | 7.79 | 7.23 | 43.32     | 46.68     | 11   | 11.90 | SA60AT  | 27.50     | -0.5                           |
| 19 | f   | 1940          | 664 | 1.64 | 2.30 | 5.23 | 21.96 | 7.92 | 7.86 | 42.61     | 42.94     | 136  | 11.62 | SA60AT  | 27.50     | 0                              |
| 20 | f   | 1930          | 562 | 1.72 | 2.28 | 5.01 | 20.85 | 7.45 | 7.31 | 45.30     | 46.17     | 55   | 10.41 | SA60AT  | 28.00     | 1                              |
| 21 | f   | 1942          | 602 | 1.53 | 2.13 | 5.44 | 21.33 | 7.67 | 7.57 | 44.01     | 44.56     | 146  | 11.76 | SA60AT  | 28.00     | -0.375                         |
| 22 | f   | 1944          | 621 | 2.05 | 2.67 | 5.38 | 21.50 | 7.92 | 7.78 | 42.60     | 43.39     | 11   | 11.85 | SA60AT  | 28.50     | -0.25                          |
| 23 | f   | 1934          | 499 | 1.84 | 2.34 | 5.44 | 21.15 | 7.58 | 7.46 | 44.53     | 45.24     | 138  | 11.98 | SA60AT  | 28.50     | -0.875                         |
| 24 | f   | 1934          | 548 | 2.29 | 2.84 | 4.71 | 21.19 | 7.51 | 7.46 | 44.92     | 45.22     | 139  | 11.65 | SA60AT  | 28.50     | -0.75                          |
| 25 | f   | 1938          | 602 | 1.74 | 2.34 | 4.58 | 20.64 | 7.45 | 7.33 | 45.30     | 46.04     | 117  | 11.64 | SA60AT  | 28.50     | 0.25                           |
| 26 | f   | 1940          | 525 | 2.21 | 2.74 | 5.24 | 21.03 | 7.50 | 7.50 | 45.00     | 45.00     | ---- | 12.01 | SA60AT  | 28.50     | 0                              |
| 27 | f   | 1945          | 542 | 1.84 | 2.38 | 5.00 | 20.05 | 7.07 | 6.83 | 47.74     | 49.41     | 3    | 11.09 | SA60AT  | 28.50     | 0.25                           |
| 28 | f   | 1957          | 578 | 1.85 | 2.43 | 4.88 | 21.11 | 7.64 | 7.46 | 44.18     | 45.26     | 179  | 11.59 | SA60AT  | 28.50     | -0.375                         |
| 29 | f   | 1942          | 540 | 2.11 | 2.65 | 4.86 | 20.80 | 7.36 | 7.30 | 45.86     | 46.23     | 62   | 11.31 | SA60AT  | 29.00     | -0.75                          |
| 30 | f   | 1949          | 628 | 1.77 | 2.40 | 4.86 | 20.65 | 7.50 | 7.20 | 45.00     | 46.88     | 154  | 11.22 | SA60AT  | 29.00     | 0                              |
| 31 | f   | 1940          | 571 | 1.85 | 2.42 | 5.00 | 21.32 | 7.80 | 7.72 | 43.25     | 43.73     | 157  | 11.88 | SA60AT  | 29.50     | -0.875                         |
| 32 | f   | 1935          | 556 | 2.16 | 2.71 | 5.44 | 21.21 | 7.59 | 7.54 | 44.48     | 44.78     | 39   | 12.33 | SA60AT  | 29.50     | -0.375                         |
| 33 | f   | 1937          | 551 | 1.92 | 2.47 | 5.42 | 21.10 | 7.61 | 7.58 | 44.36     | 44.51     | 5    | 11.90 | SA60AT  | 29.50     | -0.25                          |
| 34 | f   | 1936          | 599 | 1.70 | 2.30 | 5.01 | 21.22 | 7.87 | 7.66 | 42.88     | 44.06     | 79   | 11.41 | SA60AT  | 29.50     | 0.125                          |
| 35 | f   | 1952          | 582 | 2.70 | 3.28 | 3.95 | 21.11 | 7.76 | 7.34 | 43.49     | 45.98     | 178  | 11.83 | SA60AT  | 29.50     | -0.875                         |
| 36 | f   | 1941          | 520 | 2.02 | 2.54 | 5.04 | 21.21 | 7.81 | 7.64 | 43.21     | 44.18     | 4    | 11.24 | SA60AT  | 30.00     | -1.25                          |
| 37 | m   | 1941          | 554 | 2.34 | 2.89 | 4.49 | 20.16 | 7.27 | 7.01 | 46.42     | 48.15     | 175  | 11.58 | SA60AT  | 30.00     | 0                              |
| 38 | f   | 1949          | 546 | 2.43 | 2.98 | 4.53 | 21.30 | 7.78 | 7.62 | 43.36     | 44.31     | 178  | 12.23 | SA60AT  | 30.00     | -0.875                         |
| 39 | f   | 1932          | 553 | 1.92 | 2.47 | 4.70 | 20.94 | 7.87 | 7.66 | 42.88     | 44.06     | 76   | 12.06 | SA60AT  | 30.00     | 0.375                          |
| 40 | f   | 1934          | 555 | 1.69 | 2.24 | 5.71 | 20.60 | 7.55 | 7.23 | 44.69     | 46.68     | 177  | 11.15 | SA60AT  | 30.00     | -0.125                         |
| 41 | f   | 1954          | 523 | 1.88 | 2.40 | 4.61 | 20.37 | 7.61 | 7.10 | 44.35     | 47.54     | 174  | 11.83 | SA60AT  | 30.00     | -0.125                         |
| 42 | m   | 1939          | 536 | 2.15 | 2.69 | 4.41 | 21.23 | 7.86 | 7.78 | 42.94     | 43.38     | 138  | 11.67 | SA60AT  | 30.00     | -1.125                         |
| 43 | f   | 1936          | 555 | 2.52 | 3.08 | 4.53 | 20.63 | 7.58 | 7.25 | 44.53     | 46.55     | 91   | 12.15 | SA60AT  | 30.00     | 0                              |
| 44 | f   | 1957          | 534 | 2.09 | 2.62 | 4.63 | 21.05 | 7.85 | 7.26 | 42.99     | 46.49     | 164  | 11.76 | SA60AT  | 30.00     | -1.25                          |
| 45 | f   | 1931          | 650 | 1.56 | 2.21 | 5.55 | 21.38 | 7.94 | 7.54 | 42.51     | 44.76     | 90   | 11.30 | SA60AT  | 30.00     | -1                             |
| 46 | f   | 1940          | 576 | 1.92 | 2.50 | 5.15 | 21.12 | 7.87 | 7.70 | 42.88     | 43.83     | 116  | 11.41 | SA60AT  | 31.00     | -0.375                         |
| 47 | f   | 1953          | 648 | 2.42 | 3.07 | 4.52 | 21.09 | 7.75 | 7.56 | 43.56     | 44.67     | 43   | 11.70 | SA60AT  | 31.00     | -1.625                         |

|    |   |      |     |      |      |      |       |      |      |       |       |      |       |        |       |        |
|----|---|------|-----|------|------|------|-------|------|------|-------|-------|------|-------|--------|-------|--------|
| 48 | f | 1945 | 582 | 1.64 | 2.22 | 4.30 | 20.78 | 7.82 | 7.75 | 43.16 | 43.55 | 144  | 11.97 | SA60AT | 31.00 | -0.75  |
| 49 | f | 1936 | 575 | 1.80 | 2.38 | 5.02 | 21.32 | 8.08 | 7.89 | 41.77 | 42.78 | 123  | 11.87 | SA60AT | 31.00 | -0.625 |
| 50 | f | 1935 | 608 | 1.97 | 2.58 | 4.93 | 20.39 | 7.67 | 7.43 | 44.00 | 45.42 | 29   | 11.93 | SA60AT | 31.00 | -0.75  |
| 51 | m | 1942 | 565 | 2.39 | 2.95 | 4.87 | 21.83 | 8.27 | 8.10 | 40.79 | 41.69 | 97   | 12.76 | SA60AT | 31.00 | 0.125  |
| 52 | f | 1948 | 565 | 1.99 | 2.55 | 4.99 | 21.49 | 8.09 | 7.62 | 41.71 | 44.30 | 168  | 11.97 | SA60AT | 31.00 | -1.375 |
| 53 | f | 1936 | 644 | 1.80 | 2.45 | 5.20 | 20.90 | 7.85 | 7.63 | 43.01 | 44.23 | 98   | 11.84 | SA60AT | 31.00 | -1.125 |
| 54 | f | 1937 | 625 | 2.49 | 3.12 | 4.57 | 20.99 | 7.85 | 7.63 | 42.99 | 44.23 | 171  | 12.07 | SA60AT | 31.00 | -0.5   |
| 55 | f | 1932 | 534 | 2.11 | 2.64 | 4.82 | 21.13 | 7.90 | 7.79 | 42.72 | 43.32 | 10   | 11.92 | SA60AT | 31.00 | -0.75  |
| 56 | f | 1949 | 530 | 2.19 | 2.72 | 4.86 | 20.66 | 7.55 | 7.50 | 44.70 | 45.00 | 7    | 12.42 | SA60AT | 31.00 | -0.125 |
| 57 | m | 1950 | 627 | 3.05 | 3.67 | 4.33 | 22.53 | 8.64 | 8.24 | 39.05 | 40.95 | 87   | 12.75 | SA60AT | 31.00 | -0.75  |
| 58 | f | 1939 | 568 | 2.09 | 2.66 | 4.91 | 20.52 | 7.52 | 7.52 | 44.88 | 44.88 | ---- | 11.56 | SA60AT | 31.00 | 0      |
| 59 | m | 1933 | 516 | 2.04 | 2.56 | 5.27 | 21.75 | 8.27 | 7.92 | 40.81 | 42.61 | 179  | 12.98 | SA60AT | 31.00 | -0.75  |
| 60 | m | 1948 | 570 | 2.18 | 2.75 | 4.45 | 21.40 | 8.15 | 7.93 | 41.41 | 42.56 | 52   | 12.09 | SA60AT | 31.00 | -0.25  |
| 61 | f | 1937 | 623 | 2.09 | 2.71 | 4.67 | 20.86 | 7.69 | 7.67 | 43.89 | 44.00 | 55   | 10.89 | SA60AT | 31.00 | -0.75  |
| 62 | f | 1969 | 546 | 2.58 | 3.13 | 4.38 | 21.03 | 7.87 | 7.66 | 42.91 | 44.06 | 179  | 11.94 | SA60AT | 31.00 | -0.375 |
| 63 | m | 1954 | 538 | 2.07 | 2.61 | 4.09 | 21.38 | 8.04 | 8.04 | 41.96 | 41.96 | 0    | 11.82 | SA60AT | 31.00 | -0.375 |
| 64 | f | 1940 | 576 | 2.61 | 3.19 | 4.96 | 20.99 | 7.53 | 7.48 | 44.80 | 45.12 | 153  | 11.92 | SA60AT | 31.00 | -1.5   |
| 65 | f | 1941 | 589 | 1.87 | 2.46 | 4.76 | 21.30 | 8.12 | 7.89 | 41.56 | 42.78 | 131  | 12.13 | SA60AT | 31.00 | 0      |
| 66 | f | 1940 | 606 | 1.87 | 2.47 | 5.41 | 20.58 | 7.70 | 7.49 | 43.83 | 45.03 | 144  | 11.66 | SA60AT | 31.00 | 0.625  |
| 67 | f | 1952 | 625 | 2.74 | 3.37 | 4.60 | 21.01 | 7.69 | 7.63 | 43.87 | 44.26 | 13   | 11.79 | SA60AT | 32.00 | -0.625 |
| 68 | m | 1937 | 582 | 2.52 | 3.10 | 4.50 | 21.43 | 8.27 | 8.10 | 40.81 | 41.67 | 71   | 12.40 | SA60AT | 32.00 | -0.125 |
| 69 | f | 1935 | 527 | 1.87 | 2.40 | 5.12 | 20.09 | 7.51 | 7.33 | 44.94 | 46.04 | 93   | 11.66 | SA60AT | 32.00 | -0.125 |
| 70 | f | 1950 | 564 | 1.95 | 2.51 | 4.73 | 21.24 | 8.16 | 7.92 | 41.36 | 42.61 | 141  | 12.73 | SA60AT | 32.00 | -0.875 |
| 71 | f | 1935 | 560 | 2.07 | 2.63 | 4.90 | 20.63 | 7.71 | 7.43 | 43.77 | 45.42 | 98   | 11.59 | SA60AT | 32.00 | -1.5   |
| 72 | m | 1937 | 560 | 1.92 | 2.48 | 4.64 | 20.32 | 7.58 | 7.46 | 44.53 | 45.24 | 96   | 12.04 | SA60AT | 32.00 | -0.25  |
| 73 | f | 1929 | 564 | 2.50 | 3.06 | 4.15 | 21.20 | 8.13 | 7.95 | 41.51 | 42.45 | 119  | 11.55 | SA60AT | 32.00 | -0.5   |
| 74 | f | 1953 | 600 | 2.40 | 3.00 | 4.65 | 20.57 | 7.54 | 7.40 | 44.76 | 45.61 | 137  | 11.86 | SA60AT | 32.00 | -0.875 |
| 75 | f | 1943 | 628 | 1.80 | 2.43 | 4.48 | 20.55 | 7.78 | 7.56 | 43.38 | 44.64 | 140  | 10.90 | SA60AT | 32.00 | -1.625 |
| 76 | f | 1945 | 550 | 2.22 | 2.77 | 4.62 | 19.87 | 7.32 | 7.17 | 46.09 | 47.04 | 165  | 11.26 | SA60AT | 33.00 | -1     |
| 77 | f | 1958 | 557 | 1.78 | 2.34 | 4.90 | 20.43 | 8.09 | 7.45 | 41.72 | 45.30 | 117  | 11.05 | SA60AT | 33.00 | -1     |
| 78 | f | 1946 | 588 | 1.73 | 2.31 | 5.18 | 20.29 | 7.65 | 7.57 | 44.12 | 44.61 | 56   | 11.18 | SA60AT | 33.00 | -0.25  |
| 79 | f | 1940 | 541 | 1.68 | 2.22 | 4.60 | 20.21 | 7.70 | 7.60 | 43.83 | 44.41 | 30   | 11.04 | SA60AT | 33.00 | -1     |
| 80 | m | 1943 | 611 | 1.92 | 2.53 | 4.90 | 21.46 | 8.45 | 8.16 | 39.93 | 41.35 | 38   | 11.69 | SA60AT | 33.00 | -1.375 |
| 81 | f | 1950 | 558 | 2.55 | 3.11 | 4.13 | 20.62 | 7.88 | 7.63 | 42.83 | 44.23 | 168  | 12.28 | SA60AT | 33.00 | -0.875 |
| 82 | f | 1946 | 570 | 2.47 | 3.04 | 4.18 | 20.57 | 7.86 | 7.65 | 42.92 | 44.11 | 167  | 12.08 | SA60AT | 33.00 | -0.875 |
| 83 | f | 1946 | 610 | 1.73 | 2.34 | 4.60 | 20.32 | 7.94 | 7.74 | 42.51 | 43.60 | 174  | 11.91 | SA60AT | 34.00 | -1     |
| 84 | f | 1937 | 590 | 2.35 | 2.94 | 4.47 | 20.19 | 7.73 | 7.53 | 43.66 | 44.82 | 104  | 11.38 | SA60AT | 34.00 | -0.375 |
| 85 | f | 1946 | 504 | 1.63 | 2.13 | 5.64 | 20.60 | 7.89 | 7.46 | 42.79 | 45.23 | 164  | 11.86 | SA60AT | 34.00 | -2.625 |
| 86 | f | 1936 | 562 | 2.52 | 3.08 | 4.44 | 20.48 | 7.94 | 7.70 | 42.51 | 43.83 | 9    | 12.17 | SA60AT | 34.00 | -1     |
| 87 | f | 1950 | 557 | 2.79 | 3.35 | 3.98 | 21.01 | 8.23 | 7.23 | 41.01 | 46.68 | 2    | 11.58 | SA60AT | 34.00 | -2.75  |
| 88 | f | 1942 | 604 | 1.98 | 2.58 | 4.40 | 20.50 | 7.89 | 7.73 | 42.76 | 43.67 | 88   | 11.36 | SA60AT | 34.00 | -0.75  |
| 89 | m | 1948 | 605 | 1.76 | 2.37 | 5.22 | 19.94 | 7.70 | 7.48 | 43.83 | 45.12 | 162  | 11.70 | SA60AT | 35.00 | -1.125 |
| 90 | m | 1957 | 529 | 2.20 | 2.73 | 4.46 | 19.58 | 7.51 | 7.26 | 44.94 | 46.49 | 125  | 11.41 | SA60AT | 35.00 | -0.75  |
| 91 | m | 1948 | 595 | 2.84 | 3.44 | 4.61 | 20.66 | 7.87 | 7.79 | 42.87 | 43.32 | 26   | 12.79 | SA60AT | 35.00 | -0.375 |
| 92 | f | 1964 | 577 | 2.27 | 2.85 | 4.30 | 20.73 | 8.25 | 7.98 | 40.91 | 42.29 | 178  | 11.89 | SA60AT | 35.00 | -0.25  |
| 93 | f | 1965 | 581 | 2.40 | 2.98 | 4.84 | 20.01 | 8.19 | 7.92 | 41.21 | 42.61 | 27   | 12.66 | SA60AT | 37.00 | -0.125 |
| 94 | m | 1955 | 577 | 1.84 | 2.42 | 4.29 | 19.33 | 7.73 | 7.60 | 43.66 | 44.41 | 110  | 11.07 | SA60AT | 38.00 | -1.75  |
| 95 | f | 1949 | 563 | 2.12 | 2.68 | 4.79 | 21.21 | 7.82 | 7.66 | 43.16 | 44.06 | 83   | 12.29 | SA60AT | 29.50 | -0.375 |
| 96 | f | 1946 | 562 | 2.72 | 3.28 | 4.52 | 21.25 | 7.16 | 7.07 | 47.14 | 47.74 | 176  | 11.45 | SA60AT | 24.50 | 0      |

|     |   |      |     |      |      |      |       |      |      |       |       |     |       |        |       |        |
|-----|---|------|-----|------|------|------|-------|------|------|-------|-------|-----|-------|--------|-------|--------|
| 97  | f | 1942 | 535 | 2.09 | 2.63 | 4.16 | 21.34 | 7.26 | 7.22 | 46.49 | 46.75 | 132 | 11.64 | SA60AT | 25.50 | -0.875 |
| 98  | f | 1936 | 600 | 2.15 | 2.75 | 4.88 | 21.38 | 7.40 | 7.29 | 45.61 | 46.30 | 18  | 12.56 | SA60AT | 26.00 | -0.125 |
| 99  | f | 1946 | 520 | 2.29 | 2.81 | 4.56 | 21.23 | 7.64 | 7.54 | 44.20 | 44.75 | 16  | 11.65 | SA60AT | 29.00 | -0.5   |
| 100 | f | 1931 | 508 | 1.50 | 2.01 | 4.60 | 20.85 | 7.64 | 7.58 | 44.18 | 44.53 | 33  | 11.16 | SA60AT | 29.50 | -1     |
| 101 | m | 1942 | 585 | 1.92 | 2.51 | 4.68 | 21.27 | 7.88 | 7.53 | 42.83 | 44.82 | 96  | 11.18 | SA60AT | 30.00 | -1.25  |
| 102 | f | 1944 | 525 | 1.79 | 2.32 | 4.92 | 20.93 | 7.79 | 7.66 | 43.32 | 44.06 | 108 | 11.33 | SA60AT | 30.00 | -0.125 |
| 103 | m | 1943 | 551 | 2.12 | 2.67 | 4.77 | 21.04 | 7.81 | 7.77 | 43.21 | 43.44 | 12  | 11.59 | SA60AT | 30.00 | -0.5   |
| 104 | f | 1958 | 655 | 1.47 | 2.12 | 4.63 | 20.66 | 7.79 | 7.65 | 43.30 | 44.12 | 83  | 11.56 | SA60AT | 31.00 | -0.25  |
| 105 | m | 1957 | 570 | 1.74 | 2.31 | 5.40 | 21.50 | 8.12 | 7.79 | 41.55 | 43.31 | 87  | 11.81 | SA60AT | 31.00 | -1.25  |
| 106 | f | 1932 | 557 | 1.97 | 2.53 | 5.27 | 21.49 | 8.00 | 7.85 | 42.19 | 42.99 | 4   | 11.96 | SA60AT | 32.00 | -2     |
| 107 | f | 1938 | 530 | 2.25 | 2.78 | 4.65 | 20.38 | 7.75 | 7.29 | 43.53 | 46.30 | 92  | 11.58 | SA60AT | 32.00 | -1     |
| 108 | f | 1961 | 627 | 2.25 | 2.88 | 4.52 | 20.45 | 7.59 | 7.33 | 44.48 | 46.04 | 65  | 12.01 | SA60AT | 32.00 | -1.625 |
| 109 | m | 1962 | 572 | 2.72 | 3.29 | 4.54 | 21.34 | 8.22 | 8.09 | 41.08 | 41.70 | 125 | 12.37 | SA60AT | 33.00 | -0.5   |
| 110 | f | 1945 | 586 | 2.34 | 2.93 | 5.12 | 21.26 | 8.13 | 7.99 | 41.51 | 42.24 | 160 | 13.79 | SA60AT | 33.00 | -1.5   |
| 111 | f | 1953 | 538 | 1.86 | 2.40 | 4.83 | 18.71 | 7.76 | 7.46 | 43.48 | 45.24 | 168 | 11.62 | SA60AT | 40.00 | 0.625  |
| 112 | m | 1928 | 579 | 2.09 | 2.67 | 4.94 | 21.72 | 7.60 | 7.42 | 44.41 | 45.49 | 46  | 12.62 | ZCB00  | 26.50 | 0.25   |
| 113 | m | 1944 | 527 | 1.72 | 2.25 | 4.41 | 21.58 | 7.80 | 7.71 | 43.27 | 43.77 | 13  | 11.37 | ZCB00  | 26.50 | 0.75   |
| 114 | f | 1940 | 531 | 2.00 | 2.53 | 5.49 | 21.90 | 7.70 | 7.57 | 43.83 | 44.58 | 53  | 12.13 | ZCB00  | 27.00 | 0      |
| 115 | f | 1936 | 555 | 2.02 | 2.58 | 4.99 | 21.25 | 7.34 | 7.25 | 45.98 | 46.55 | 108 | 11.66 | ZCB00  | 27.00 | 0.25   |
| 116 | f | 1955 | 612 | 2.02 | 2.63 | 4.57 | 21.41 | 7.55 | 7.54 | 44.70 | 44.76 | 7   | 11.45 | ZCB00  | 28.00 | 0.25   |
| 117 | f | 1936 | 546 | 2.19 | 2.74 | 4.83 | 21.62 | 7.99 | 7.44 | 42.24 | 45.36 | 160 | 12.13 | ZCB00  | 28.50 | -0.625 |
| 118 | m | 1934 | 539 | 2.19 | 2.73 | 5.10 | 20.96 | 7.39 | 7.33 | 45.67 | 46.04 | 30  | 11.91 | ZCB00  | 28.50 | 0.25   |
| 119 | f | 1948 | 596 | 2.36 | 2.96 | 4.63 | 20.89 | 7.41 | 7.38 | 45.55 | 45.73 | 81  | 13.35 | ZCB00  | 29.00 | 0.375  |
| 120 | f | 1943 | 480 | 2.35 | 2.83 | 4.11 | 20.86 | 7.34 | 7.29 | 45.98 | 46.30 | 172 | 11.66 | ZCB00  | 29.00 | -1.25  |
| 121 | m | 1967 | 589 | 2.35 | 2.94 | 4.66 | 20.42 | 7.16 | 7.12 | 47.13 | 47.43 | 154 | 11.77 | ZCB00  | 29.50 | -0.375 |
| 122 | m | 1967 | 645 | 2.35 | 3.00 | 4.38 | 21.65 | 7.96 | 7.90 | 42.40 | 42.72 | 44  | 11.89 | ZCB00  | 30.00 | -0.125 |
| 123 | m | 1947 | 540 | 2.31 | 2.85 | 4.33 | 21.39 | 7.94 | 7.61 | 42.51 | 44.35 | 39  | 12.29 | ZCB00  | 30.00 | 0      |
| 124 | f | 1959 | 616 | 2.51 | 3.13 | 4.44 | 20.80 | 7.64 | 7.57 | 44.18 | 44.58 | 16  | 12.08 | ZCB00  | 30.50 | -0.25  |
| 125 | f | 1970 | 549 | 2.56 | 3.11 | 4.39 | 21.53 | 7.95 | 7.85 | 42.45 | 42.99 | 125 | 11.13 | ZCB00  | 31.00 | -0.75  |
| 126 | f | 1966 | 476 | 2.36 | 2.84 | 4.51 | 20.87 | 7.54 | 7.40 | 44.76 | 45.61 | 175 | 11.97 | ZCB00  | 31.00 | -1     |
| 127 | m | 1953 | 564 | 2.17 | 2.73 | 4.63 | 21.07 | 7.96 | 7.59 | 42.40 | 44.47 | 16  | 11.95 | ZCB00  | 31.00 | -0.5   |
| 128 | m | 1939 | 579 | 1.63 | 2.21 | 5.44 | 21.01 | 7.89 | 7.79 | 42.78 | 43.32 | 109 | 12.41 | ZCB00  | 32.00 | -0.375 |
| 129 | f | 1968 | 536 | 2.57 | 3.11 | 4.13 | 20.68 | 7.65 | 7.44 | 44.12 | 45.36 | 6   | 12.46 | ZCB00  | 32.00 | -0.25  |
| 130 | m | 1935 | 605 | 2.72 | 3.33 | 4.00 | 21.18 | 8.04 | 7.75 | 41.98 | 43.55 | 174 | 12.20 | ZCB00  | 32.00 | -0.25  |
| 131 | m | 1933 | 507 | 2.06 | 2.56 | 4.85 | 20.80 | 8.01 | 7.93 | 42.12 | 42.54 | 70  | 11.85 | ZCB00  | 33.00 | -0.5   |
| 132 | f | 1954 | 545 | 2.49 | 3.04 | 4.47 | 21.33 | 7.10 | 6.91 | 47.53 | 48.83 | 152 | 11.36 | ZCB00  | 24.50 | -0.625 |
| 133 | m | 1972 | 536 | 2.55 | 3.09 | 4.01 | 21.29 | 7.83 | 7.69 | 43.10 | 43.89 | 74  | 12.42 | ZCB00  | 31.00 | -0.5   |
| 134 | f | 1974 | 533 | 2.29 | 2.82 | 4.16 | 21.70 | 8.20 | 8.05 | 41.16 | 41.93 | 0   | 12.22 | ZCB00  | 31.00 | -0.125 |
| 135 | m | 1930 | 581 | 1.98 | 2.56 | 5.06 | 20.59 | 7.37 | 7.33 | 45.79 | 46.04 | 99  | 11.85 | ZCB00  | 31.00 | 0      |
| 136 | m | 1944 | 577 | 1.74 | 2.32 | 5.61 | 21.24 | 7.84 | 7.74 | 43.05 | 43.63 | 152 | 11.76 | ZCB00  | 31.00 | -0.75  |
| 137 | f | 1956 | 514 | 1.71 | 2.22 | 5.00 | 20.72 | 8.19 | 8.03 | 41.21 | 42.03 | 158 | 12.10 | ZCB00  | 34.00 | -0.375 |
| 138 | f | 1947 | 622 | 1.71 | 2.33 | 5.32 | 20.50 | 7.54 | 7.28 | 44.76 | 46.36 | 179 | 11.79 | ZCB00  | 30.50 | 0      |
| 139 | f | 1964 | 522 | 2.48 | 3.00 | 4.22 | 21.00 | 7.16 | 6.90 | 47.14 | 48.91 | 19  | 11.40 | ZCB00  | 25.50 | -0.375 |
| 140 | m | 1945 | 525 | 2.36 | 2.89 | 5.30 | 20.51 | 7.40 | 7.15 | 45.61 | 47.20 | 168 | 12.39 | ZCB00  | 30.50 | 0.125  |
| 141 | f | 1964 | 610 | 2.50 | 3.11 | 3.85 | 20.75 | 7.74 | 7.44 | 43.60 | 45.36 | 103 | 11.54 | ZCB00  | 31.00 | -0.25  |
| 142 | m | 1937 | 567 | 1.94 | 2.51 | 5.44 | 21.22 | 7.21 | 6.90 | 46.81 | 48.91 | 65  | 11.31 | ZCB00  | 24.50 | 0.25   |
| 143 | m | 1951 | 581 | 1.67 | 2.25 | 4.80 | 20.71 | 7.75 | 7.42 | 43.55 | 45.49 | 36  | 11.67 | ZCB00  | 31.00 | -1     |
| 144 | f | 1964 | 531 | 2.24 | 2.77 | 4.38 | 21.86 | 8.48 | 8.09 | 39.80 | 41.72 | 178 | 11.71 | ZCB00  | 31.50 | -0.5   |
| 145 | f | 1937 | 585 | 1.78 | 2.37 | 5.66 | 20.97 | 7.81 | 7.52 | 43.21 | 44.88 | 79  | 11.88 | ZCB00  | 32.00 | -0.25  |

|     |   |      |     |      |      |      |       |      |      |       |       |     |       |       |       |        |
|-----|---|------|-----|------|------|------|-------|------|------|-------|-------|-----|-------|-------|-------|--------|
| 146 | f | 1960 | 571 | 2.18 | 2.75 | 4.64 | 20.19 | 7.39 | 6.85 | 45.68 | 49.27 | 175 | 11.50 | ZCB00 | 30.00 | 0.25   |
| 147 | f | 1944 | 543 | 2.35 | 2.89 | 4.82 | 21.62 | 8.37 | 7.64 | 40.32 | 44.18 | 166 | 12.43 | ZCB00 | 31.00 | 0      |
| 148 | f | 1946 | 517 | 2.82 | 3.34 | 4.59 | 21.13 | 7.95 | 7.09 | 42.45 | 47.60 | 8   | 12.61 | ZCB00 | 30.00 | -0.125 |
| 149 | m | 1967 | 588 | 2.44 | 3.03 | 4.07 | 20.20 | 8.13 | 7.12 | 41.51 | 47.40 | 167 | 11.93 | ZCB00 | 34.00 | -0.25  |
| 150 | f | 1968 | 570 | 2.67 | 3.24 | 4.19 | 22.15 | 8.72 | 7.60 | 38.71 | 44.44 | 165 | 12.58 | ZCB00 | 29.50 | -0.25  |

**Abbreviations:**

f = Female

m = Male

CCT = Central corneal thickness ( $\mu\text{m}$ )

AD = Aqueous depth (mm)

ACD = Anterior chamber depth (mm)

LT = Lens thickness (mm)

R = Corneal radius of curvature (mm)

K = Keratometry measurement of the corneal curvature (Diopters)

WTW = White to White corneal horizontal diameter (mm)

IOL = Intraocular lens

SEQ = Spherical equivalent (Diopters)
