# Supplementary material
Source: HighWire-hosted journal article supplement (https://bjo.bmj.com/content/106/6/795)
Supplement: inline-supplementary-material-2 [file inline-supplementary-material-2.pdf]

Addendum 3: Castrop Formula Calculator Spreadsheet

| J&J ZCB00   | Name | Gender | Date of birth | Eye | LVC | CCT    | AQD  | ACD  | LT   | AL    | R1   | R2   | AXIS   | rpmean | WTW   | CAS  | RAUX | ALnew | ELP  | K     | IOL   | Rx    |
|-------------|------|--------|---------------|-----|-----|--------|------|------|------|-------|------|------|--------|--------|-------|------|------|-------|------|-------|-------|-------|
| Calibration | 1000 | 1      | 19.06.1948    | OD  | 0   | 612.00 | 2.35 | 2.96 | 4.27 | 23.64 | 8.07 | 8.07 | ----   | 6.71   | 12.34 | 0.41 | 0.27 | 23.67 | 4.57 | 40.75 | 23.50 | -0.41 |
| Calibration | 1001 | 1      | 18.05.1947    | OS  | 0   | 566.00 | 2.62 | 3.19 | 4.46 | 23.14 | 7.51 | 7.47 | 150.00 | 6.23   | 12.08 | 0.41 | 0.27 | 23.18 | 4.84 | 43.91 | 21.50 | -0.35 |
| Calibration | 1002 | 1      | 22.11.1990    | OS  | 0   | 493.00 | 3.48 | 3.97 | 4.50 | 23.48 | 7.69 | 7.54 | 171.00 | 6.33   | 12.41 | 0.41 | 0.27 | 23.50 | 5.39 | 43.17 | 22.00 | -0.09 |
| Calibration | 1003 | 1      | 12.06.1934    | OS  | 0   | 556.00 | 2.73 | 3.29 | 4.86 | 23.80 | 7.99 | 7.50 | 79.00  | 6.44   | 11.95 | 0.41 | 0.27 | 23.79 | 5.05 | 42.46 | 21.00 | 0.06  |
| Calibration | 1004 | 1      | 29.03.1929    | OD  | 0   | 515.00 | 3.08 | 3.60 | 4.46 | 24.49 | 7.98 | 7.89 | 86.00  | 6.60   | 12.95 | 0.41 | 0.27 | 24.47 | 5.13 | 41.43 | 20.50 | -0.23 |
| Calibration | 1005 | 1      | 18.05.1954    | OS  | 0   | 566.00 | 2.90 | 3.47 | 4.62 | 24.31 | 7.74 | 7.66 | 80.00  | 6.40   | 11.92 | 0.41 | 0.27 | 24.29 | 5.13 | 42.71 | 19.50 | -0.35 |
| Calibration | 1006 | 1      | 13.09.1965    | OD  | 0   | 637.00 | 1.82 | 2.46 | 4.19 | 20.43 | 7.92 | 7.58 | 177.00 | 6.44   | 11.64 | 0.41 | 0.27 | 20.59 | 4.06 | 42.45 | 33.50 | -0.85 |
| Calibration | 1007 | 1      | 07.11.1945    | OS  | 0   | 506.00 | 2.93 | 3.44 | 4.93 | 22.90 | 7.67 | 7.52 | 100.00 | 6.31   | 11.83 | 0.41 | 0.27 | 22.92 | 5.17 | 43.29 | 23.50 | 0.10  |
| Calibration | 1008 | 1      | 19.03.1940    | OD  | 0   | 565.00 | 2.70 | 3.27 | 4.56 | 23.56 | 7.91 | 7.72 | 103.00 | 6.50   | 12.41 | 0.41 | 0.27 | 23.57 | 4.91 | 42.08 | 22.50 | -0.24 |
| Calibration | 1009 | 1      | 30.06.1929    | OD  | 0   | 568.00 | 2.23 | 2.80 | 4.94 | 23.19 | 8.12 | 7.90 | 114.00 | 6.66   | 11.24 | 0.41 | 0.27 | 23.20 | 4.70 | 41.05 | 25.00 | -0.29 |
| Calibration | 1010 | 1      | 07.11.1933    | OS  | 0   | 578.00 | 2.64 | 3.22 | 4.50 | 23.55 | 8.04 | 7.91 | 162.00 | 6.63   | 12.95 | 0.41 | 0.27 | 23.57 | 4.84 | 41.23 | 23.50 | -0.21 |
| Calibration | 1011 | 1      | 26.10.1942    | OD  | 0   | 521.00 | 1.67 | 2.19 | 4.93 | 22.02 | 7.43 | 7.35 | 138.00 | 6.14   | 11.91 | 0.41 | 0.27 | 22.08 | 4.31 | 44.49 | 24.50 | -0.67 |
| Calibration | 1012 | 1      | 16.01.1941    | OS  | 0   | 602.00 | 1.99 | 2.59 | 5.31 | 23.24 | 8.02 | 7.76 | 126.00 | 6.56   | 12.19 | 0.41 | 0.27 | 23.22 | 4.73 | 41.68 | 24.00 | -0.23 |
| Calibration | 1013 | 1      | 23.09.1927    | OD  | 0   | 576.00 | 1.74 | 2.32 | 5.53 | 22.41 | 7.62 | 7.58 | 47.00  | 6.32   | 11.90 | 0.41 | 0.27 | 22.42 | 4.64 | 43.27 | 25.00 | -0.31 |
| Calibration | 1014 | 1      | 13.10.1941    | OD  | 0   | 540.00 | 2.46 | 3.00 | 4.80 | 22.87 | 7.56 | 7.50 | 109.00 | 6.26   | 11.94 | 0.41 | 0.27 | 22.90 | 4.84 | 43.67 | 22.50 | -0.03 |
| Calibration | 1015 | 1      | 17.05.1938    | OS  | 0   | 592.00 | 2.87 | 3.46 | 4.13 | 23.05 | 7.84 | 7.76 | 113.00 | 6.48   | 11.96 | 0.41 | 0.27 | 23.11 | 4.85 | 42.16 | 24.00 | -0.18 |
| Calibration | 1016 | 1      | 01.11.1943    | OD  | 0   | 550.00 | 3.45 | 4.00 | 4.75 | 25.18 | 8.14 | 8.02 | 179.00 | 6.72   | 13.73 | 0.41 | 0.27 | 25.12 | 5.54 | 40.69 | 19.50 | 0.12  |
| Calibration | 1017 | 1      | 29.06.1951    | OD  | 0   | 564.00 | 1.91 | 2.47 | 4.59 | 22.61 | 7.90 | 7.82 | 11.00  | 6.53   | 12.06 | 0.41 | 0.27 | 22.66 | 4.34 | 41.83 | 25.50 | -0.49 |
| Calibration | 1018 | 1      | 27.07.1968    | OD  | 0   | 558.00 | 2.85 | 3.41 | 4.14 | 26.68 | 8.25 | 8.00 | 7.00   | 6.75   | 12.69 | 0.41 | 0.27 | 26.59 | 4.94 | 40.47 | 14.50 | 0.00  |
| Calibration | 1019 | 1      | 31.05.1933    | OD  | 0   | 538.00 | 2.68 | 3.22 | 4.77 | 23.52 | 7.62 | 7.46 | 91.00  | 6.27   | 11.94 | 0.41 | 0.27 | 23.52 | 5.00 | 43.61 | 20.50 | -0.09 |
| Calibration | 1020 | 1      | 22.06.1936    | OD  | 0   | 497.00 | 2.74 | 3.24 | 4.42 | 23.78 | 7.51 | 7.40 | 93.00  | 6.20   | 11.66 | 0.41 | 0.27 | 23.79 | 4.89 | 44.10 | 18.50 | -0.03 |
| Calibration | 1021 | 1      | 17.06.1944    | OS  | 0   | 553.00 | 2.30 | 2.85 | 4.71 | 23.32 | 7.96 | 7.84 | 90.00  | 6.57   | 12.36 | 0.41 | 0.27 | 23.33 | 4.67 | 41.62 | 23.50 | -0.20 |
| Calibration | 1022 | 1      | 11.09.1935    | OD  | 0   | 557.00 | 2.66 | 3.22 | 4.99 | 24.53 | 8.00 | 7.66 | 101.00 | 6.51   | 12.18 | 0.41 | 0.27 | 24.48 | 5.09 | 41.99 | 19.50 | -0.16 |
| Calibration | 1023 | 1      | 05.02.1957    | OS  | 0   | 514.00 | 2.24 | 2.75 | 4.83 | 23.79 | 8.29 | 8.16 | 138.00 | 6.84   | 11.96 | 0.41 | 0.27 | 23.78 | 4.63 | 39.96 | 24.00 | -0.20 |
| Calibration | 1024 | 1      | 30.12.1944    | OS  | 0   | 495.00 | 3.48 | 3.98 | 4.34 | 26.34 | 8.50 | 8.32 | 79.00  | 6.99   | 12.17 | 0.41 | 0.27 | 26.25 | 5.36 | 39.08 | 18.00 | -0.02 |
| Calibration | 1025 | 1      | 17.05.1950    | OS  | 0   | 574.00 | 2.03 | 2.60 | 5.04 | 22.66 | 7.53 | 7.31 | 116.00 | 6.17   | 12.24 | 0.41 | 0.27 | 22.68 | 4.66 | 44.33 | 22.50 | -0.33 |
| Calibration | 1026 | 1      | 29.12.1936    | OS  | 0   | 547.00 | 2.74 | 3.29 | 4.33 | 24.29 | 7.68 | 7.50 | 50.00  | 6.31   | 13.18 | 0.41 | 0.27 | 24.28 | 4.89 | 43.32 | 18.00 | -0.17 |
| Calibration | 1027 | 1      | 12.02.1981    | OS  | 0   | 639.00 | 3.38 | 4.02 | 3.77 | 26.49 | 7.70 | 7.67 | 62.00  | 6.39   | 12.47 | 0.41 | 0.27 | 26.42 | 5.27 | 42.81 | 12.50 | -0.34 |
| Calibration | 1028 | 1      | 19.11.1946    | OS  | 0   | 563.00 | 2.62 | 3.18 | 4.57 | 22.45 | 7.59 | 7.40 | 13.00  | 6.23   | 11.90 | 0.41 | 0.27 | 22.51 | 4.84 | 43.88 | 24.00 | -0.14 |
| Calibration | 1029 | 1      | 15.08.1926    | OS  | 0   | 522.00 | 2.15 | 2.67 | 5.27 | 24.05 | 8.21 | 7.21 | 170.00 | 6.41   | 12.33 | 0.41 | 0.27 | 24.00 | 4.78 | 42.64 | 19.50 | 0.03  |

0 = normal cornea, 1 = LVC or other pathologies  
 central corneal thickness  
 internal chamber depth  
 external chamber depth, derived from CCT+AQD  
 lens thickness (optical)  
 axial length (optical)  
 flat r (mm)  
 steep r (mm)  
 flat axis (not required for power calc)  
 derived from anterior r according to Liou & Brennan, can be overwritten if reliable m  
 not required in current version  
 comparable to Olsen's C constant, refers to LT  
 2nd constant to adjust residual offsets  
 ALas "sum of segments" according to Cooke  
 ELP calc with or without corneal radii depending on column "F"  
 derived corneal power (diopters, thick lens calc)  
 in rare cases like LVC, it would make sense to overwrite this with a total K measured by tomography  
 IOL to implant  
 expected refraction (6 m = 20 ft)

data input, mandatory columns      IOL constants      derived values, no entry!      output

Constants optimized on real refraction data so far

| IOL           | Cases | Cas  | Raux  |
|---------------|-------|------|-------|
| J&J ZCB00     | 91    | 0.41 | 0.25  |
| Alcon SA60AT  | 296   | 0.37 | 0.00  |
| Alcon Clareon | 40    | 0.40 | 0.24  |
| B&L MX60      | 136   | 0.42 | 0.01  |
| Hoya Vivinex  | 30    | 0.40 | 0.14  |
| J&J AAB00     | 85    | 0.39 | -0.15 |
